# Supplementary material for: Timing of calcium nitrate addition affects morphology, dispersity and composition of bioactive glass nanoparticles
Source: Royal Society of Chemistry journal article supplement (doi:10.1039/c6ra05548f), 2016-01-01
Supplement: c6ra05548f1.pdf [file c6ra05548f1.pdf]

Ca-free Si,  $^{29}\text{Si}$  HPDEC MAS NMR

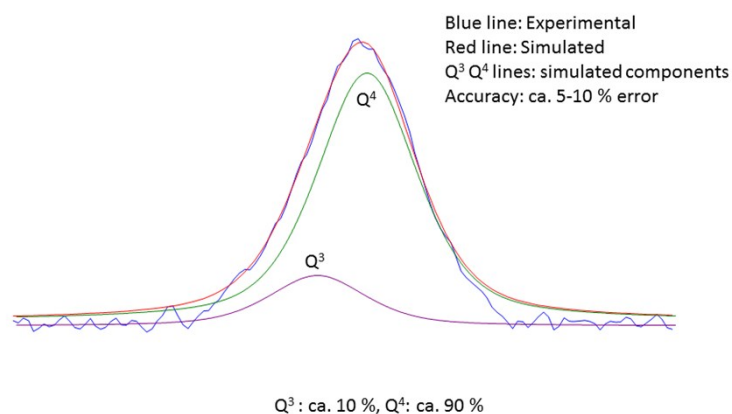

BGN-30,  $^{29}\text{Si}$  HPDEC MAS NMR

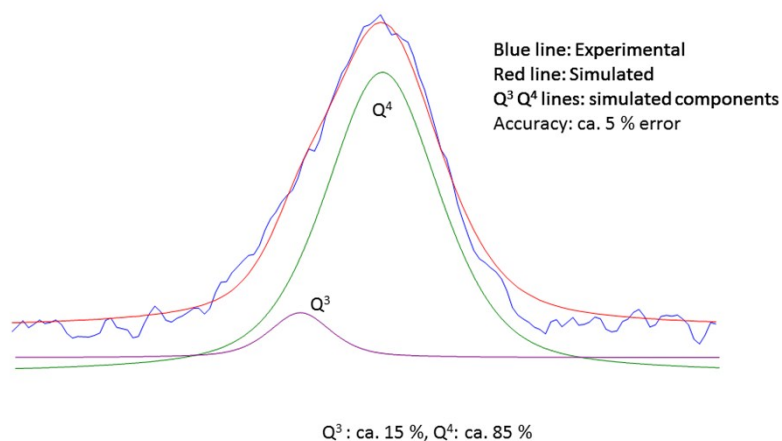

**S-Figure 1**  $^{29}\text{Si}$  MAS NMR spectra of Ca-free silica nanoparticles and BGN-30 were simulated by two components for the quantitative evaluation of  $\text{Q}^4$  and  $\text{Q}^3$  species.
